# Supplementary material
Source: Springer Nature journal article supplement (https://www.springermedizin.de/resource/supplementary/12958_2013_1171_MOESM1_ESM.pdf/9566698)
Supplement: MOESM1 [file 9566698]

293T MCF7

62 kDa

45 kDa

30 kDa

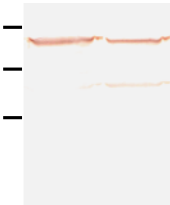

← SMILE

← Zhangfei
